# Supplementary material for: Molecular analysis of blood-associated pathogens in European wildcats (Felis silvestris silvestris) from Germany
Source: PubMed Central journal article supplement (PMC9477852; doi:10.1016/j.ijppaw.2022.08.012), 2022-09-03
Supplement: mmc1.pdf [file mmc1.pdf]

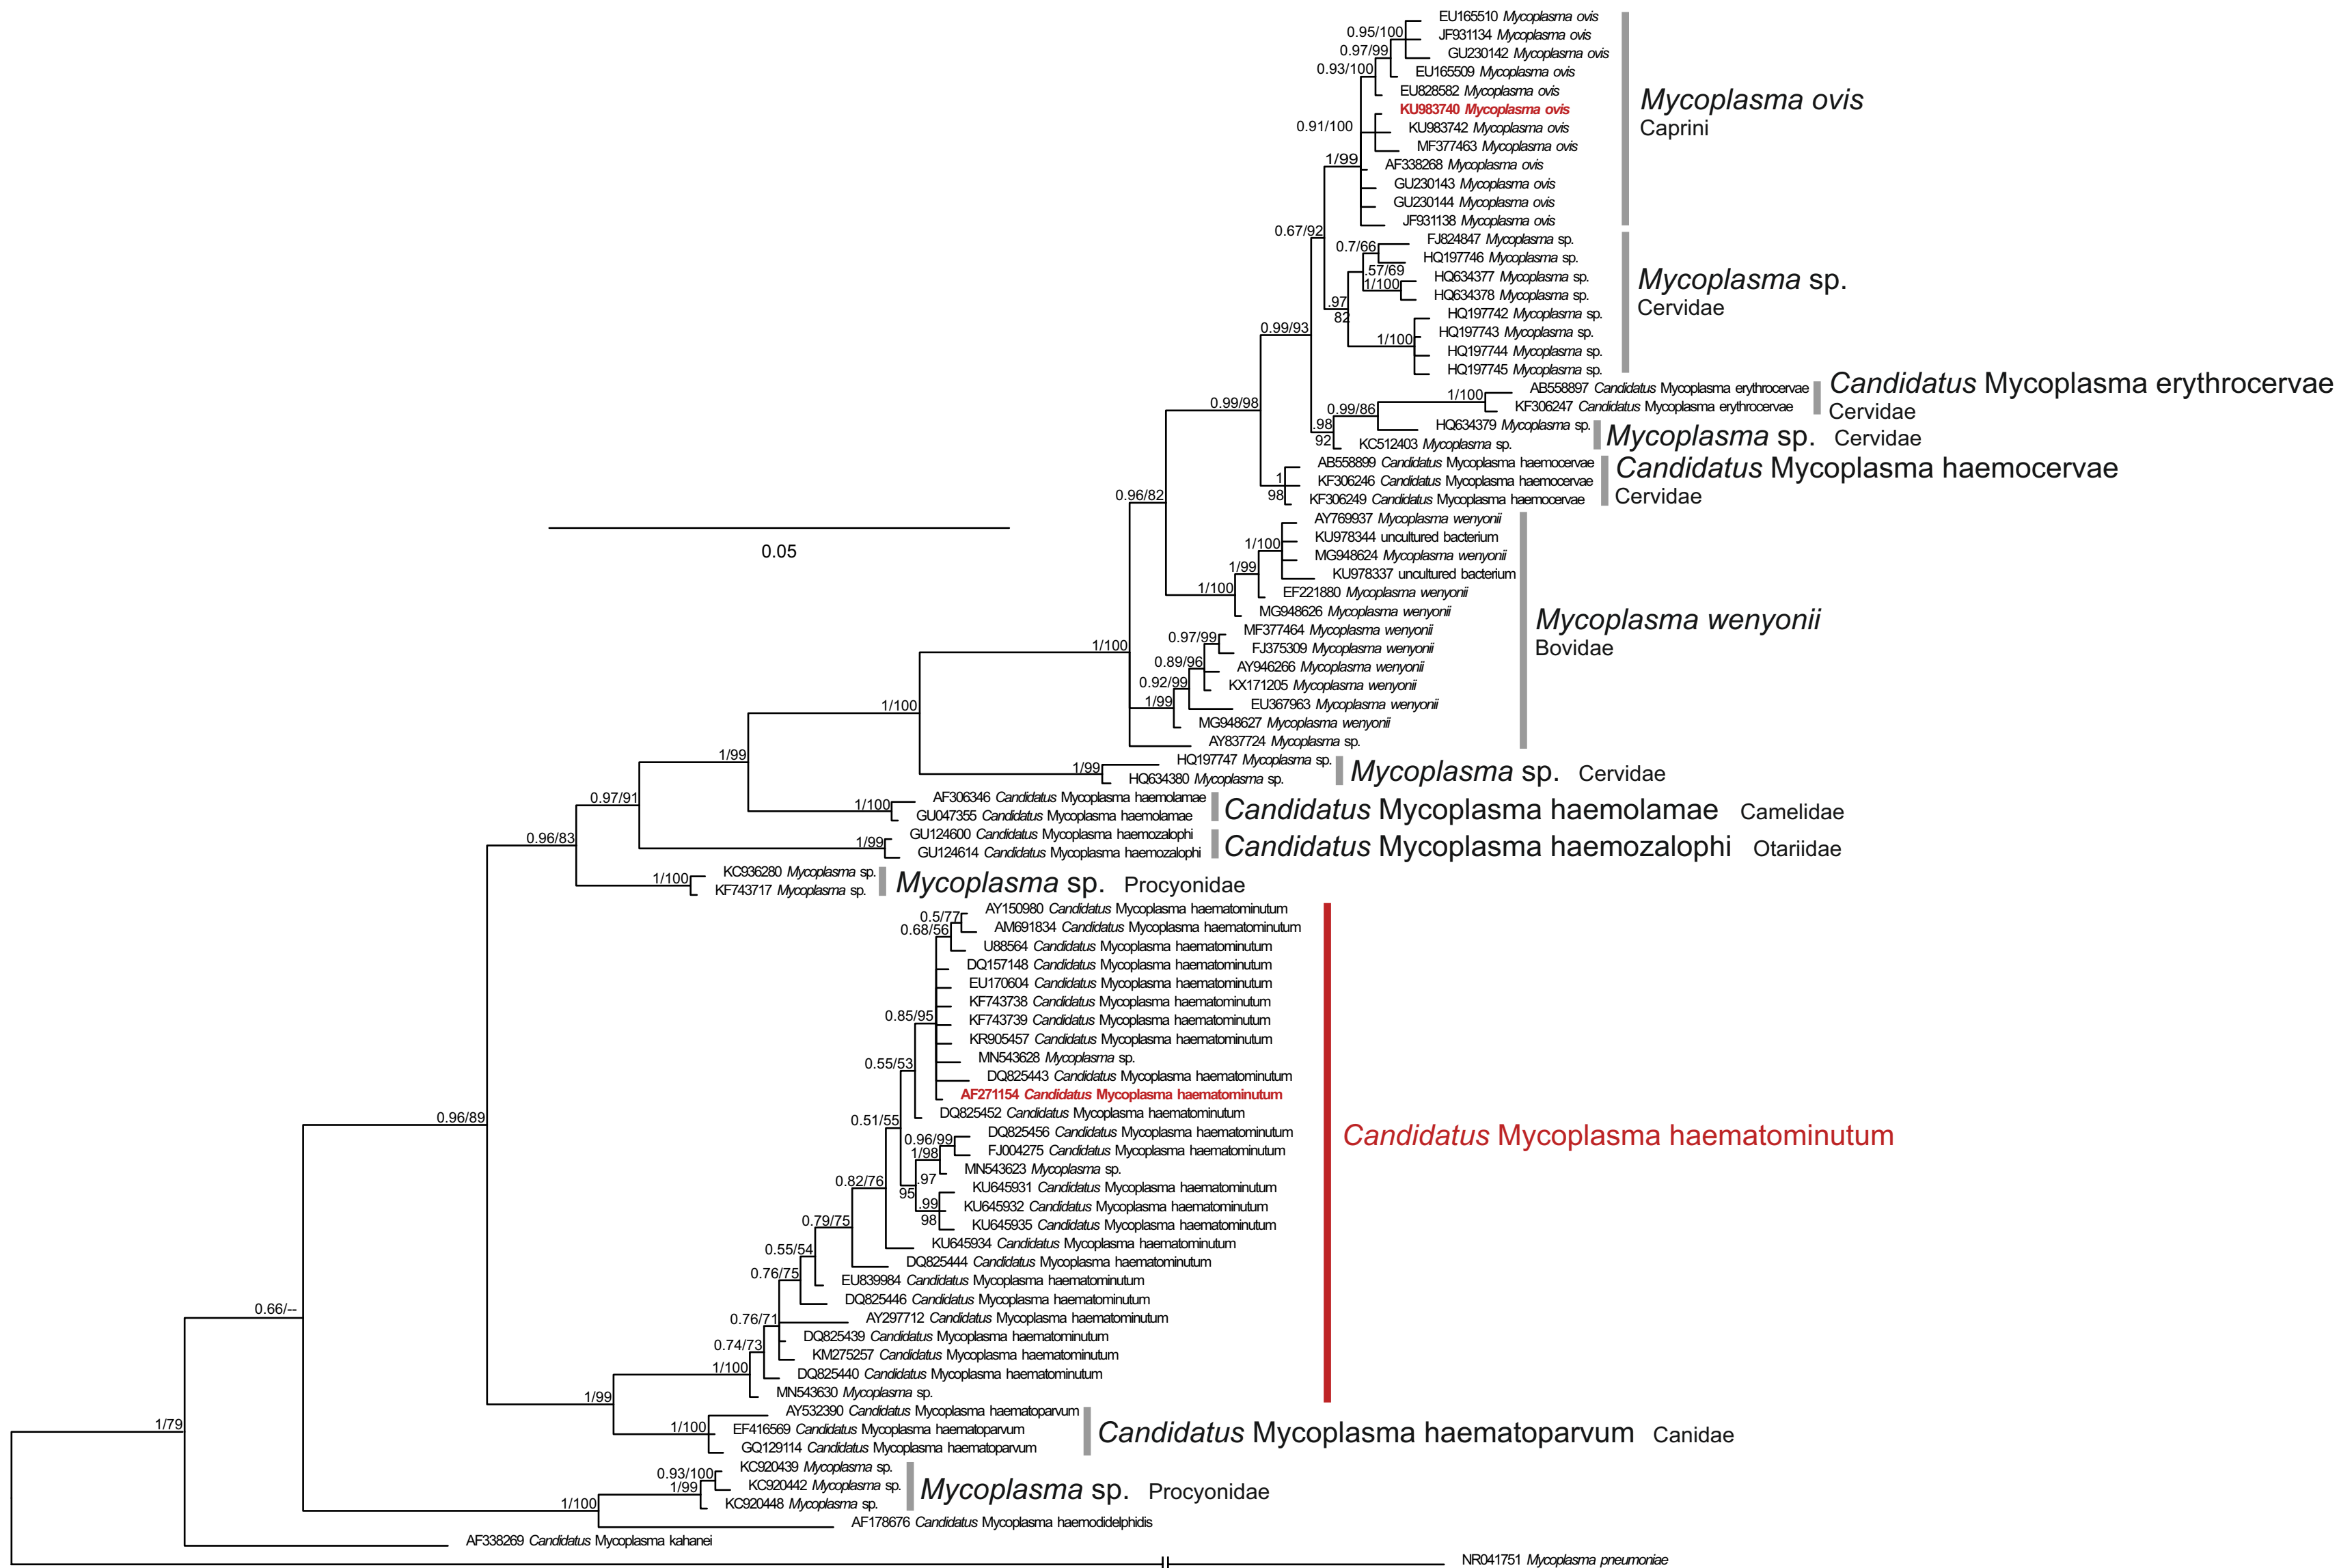

**Supplement 1.** Bayesian interference (BI) tree featuring 16S rRNA sequences (969 nucleotide positions) of selected *Mycoplasma* spp. Nodes are marked with BI posterior probabilities and ML bootstrap values. Clades which are marked in red were used for calculation of the median-joining haplotype networks containing the sequences obtained in this study. Scale bar indicates the expected mean number of substitutions per site according to the model of sequence evolution applied.
